# Supplementary material for: Effect of intraoperative personalized goal-directed hemodynamic management on acute myocardial injury in high-risk patients having major abdominal surgery: a post-hoc secondary analysis of a randomized clinical trial
Source: Springer Nature journal article supplement (doi:10.1007/s10877-022-00826-0), 2022-02-24

**Supplemental Digital Content Figure 1:** Stacked bar chart showing the number of men and women with (red) and without (grey) acute myocardial injury in the personalized goal-directed hemodynamic management group and the routine hemodynamic management group.

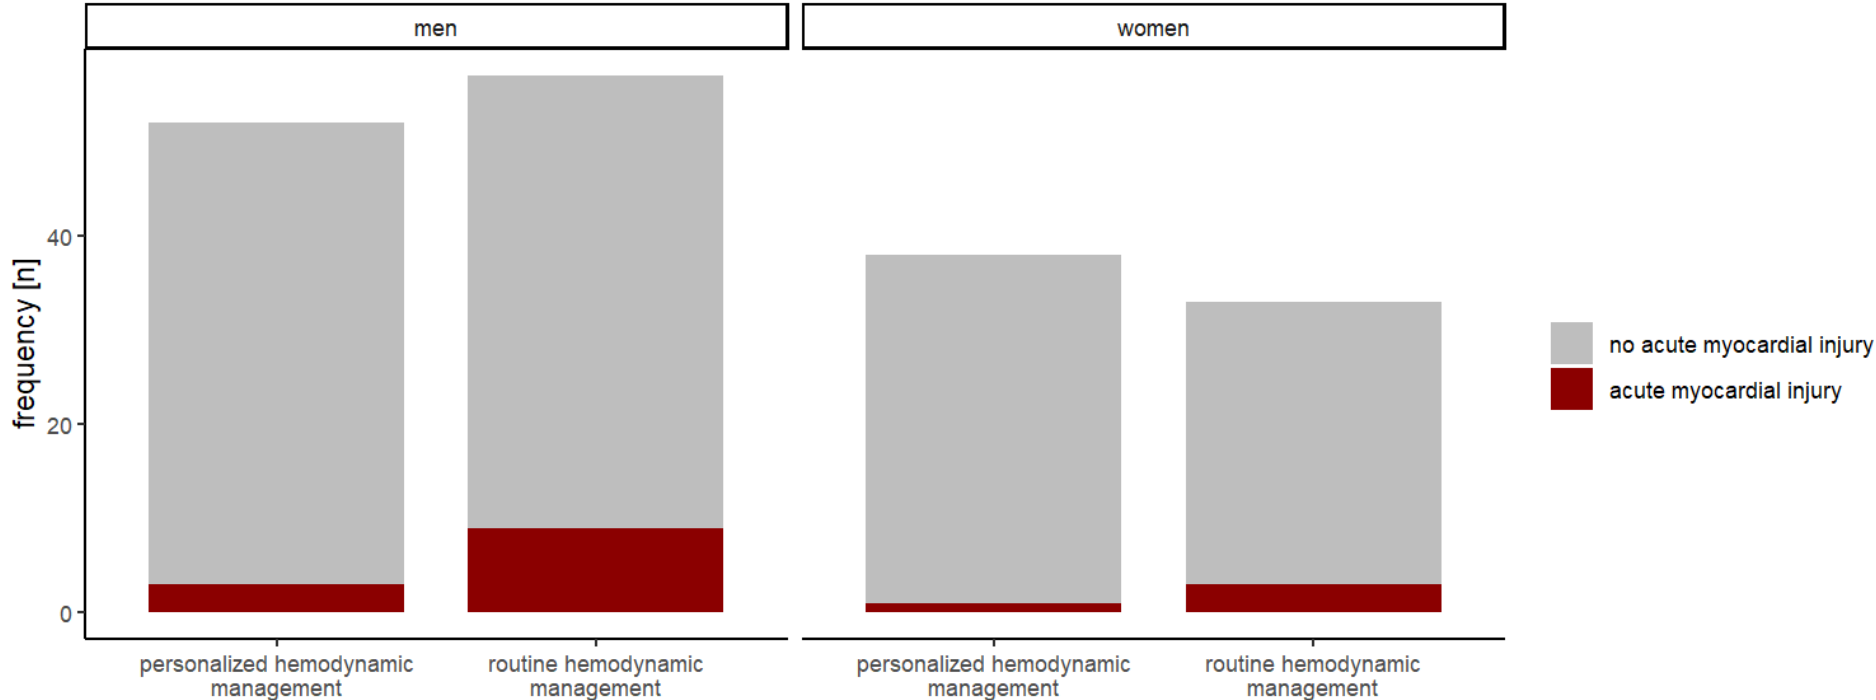

Supplement: MOESM1 [file 20165618]
